# Supplementary material
Source: PubMed Central journal article supplement (PMC4529771)
Supplement: NIHMS708926-supplement.pdf [file NIHMS708926-supplement.pdf]

## Supplementary Materials for

### Natural variation of the expression pattern of the segmentation gene *even-skipped* in *Drosophila melanogaster*

Pengyao Jiang<sup>1,\*</sup>, Michael Z Ludwig<sup>1,2</sup>, Martin Kreitman<sup>1,2</sup>, John Reinitz<sup>1,2,3,4</sup>

1 Department of Ecology & Evolution, University of Chicago, IL 60637, USA

2 Institute for Genomics & Systems Biology, Chicago, IL 60637, USA

3 Department of Statistics, University of Chicago, IL 60637, USA

4 Department of Molecular Genetics and Cell Biology, University of Chicago, IL 60637, USA

\* E-mail: pyjiang@uchicago.edu, Phone: 773-834-5823

Table S1. Significance tests for stripe height

| position | time class | p value                   | lines compared |
|----------|------------|---------------------------|----------------|
| 8        | 4          | $2.578690 \times 10^{-8}$ | L1 L2          |
| 8        | 5          | $2.312320 \times 10^{-8}$ | L1 L2          |
| 9        | 4          | $1.309975 \times 10^{-5}$ | L1 L2          |
| 9        | 5          | $2.312320 \times 10^{-8}$ | L1 L2          |
| 2        | 4          | $6.549873 \times 10^{-6}$ | L1 L5          |
| 2        | 5          | $5.278690 \times 10^{-4}$ | L1 L5          |
| 2        | 7          | $7.342234 \times 10^{-5}$ | L1 L5          |
| 3        | 4          | $2.654761 \times 10^{-5}$ | L1 L5          |
| 3        | 7          | $1.101335 \times 10^{-4}$ | L1 L5          |
| 6        | 7          | $4.699030 \times 10^{-4}$ | L1 L5          |
| 6        | 8          | $5.292265 \times 10^{-5}$ | L1 L5          |
| 7        | 8          | $5.292265 \times 10^{-5}$ | L1 L5          |
| 8        | 8          | $2.646133 \times 10^{-5}$ | L1 L5          |
| 9        | 8          | $2.646133 \times 10^{-5}$ | L1 L5          |
| 12       | 8          | $7.938398 \times 10^{-4}$ | L1 L5          |
| 1        | 6          | $2.862549 \times 10^{-4}$ | L2 L5          |
| 1        | 7          | $2.010140 \times 10^{-4}$ | L2 L5          |
| 2        | 7          | $2.712094 \times 10^{-5}$ | L2 L5          |
| 2        | 8          | $7.654884 \times 10^{-4}$ | L2 L5          |
| 3        | 4          | $2.756877 \times 10^{-4}$ | L2 L5          |
| 3        | 5          | $8.017171 \times 10^{-4}$ | L2 L5          |
| 3        | 7          | $2.712094 \times 10^{-5}$ | L2 L5          |
| 5        | 7          | $6.611727 \times 10^{-4}$ | L2 L5          |
| 6        | 6          | $4.483716 \times 10^{-4}$ | L2 L5          |
| 6        | 7          | $3.988374 \times 10^{-7}$ | L2 L5          |
| 6        | 8          | $2.835142 \times 10^{-6}$ | L2 L5          |
| 7        | 7          | $2.712094 \times 10^{-5}$ | L2 L5          |
| 7        | 8          | $2.835142 \times 10^{-6}$ | L2 L5          |
| 8        | 4          | $2.578690 \times 10^{-8}$ | L2 L5          |
| 8        | 5          | $4.242361 \times 10^{-9}$ | L2 L5          |
| 8        | 6          | $5.565384 \times 10^{-4}$ | L2 L5          |
| 8        | 8          | $8.505426 \times 10^{-5}$ | L2 L5          |
| 9        | 4          | $7.736070 \times 10^{-7}$ | L2 L5          |
| 9        | 5          | $8.484722 \times 10^{-9}$ | L2 L5          |
| 10       | 8          | $3.402171 \times 10^{-5}$ | L2 L5          |
| 11       | 4          | $5.278578 \times 10^{-5}$ | L2 L5          |
| 11       | 7          | $2.586460 \times 10^{-4}$ | L2 L5          |
| 11       | 8          | $1.984600 \times 10^{-5}$ | L2 L5          |
| 12       | 8          | $2.750088 \times 10^{-4}$ | L2 L5          |

**Table S1** The table shows all the significant pairwise rank sum tests for stripe height after Bonferroni correction. The positions are numbered 1 to 12. '1' indicates the posterior half of stripe 1 height, '12' indicates the anterior half of stripe 7 height. '2-11' denote sequentially anterior and posterior of stripes 2-6 height. Time class is as indicated.

**Table S2. Significance tests for normalized stripe height**

| position | time class | p value                   | lines compared |
|----------|------------|---------------------------|----------------|
| 4        | 4          | $2.214837 \times 10^{-4}$ | L1 L2          |
| 8        | 4          | $3.094428 \times 10^{-7}$ | L1 L2          |
| 8        | 5          | $2.312320 \times 10^{-8}$ | L1 L2          |
| 9        | 4          | $1.112189 \times 10^{-4}$ | L1 L2          |
| 9        | 5          | $2.312320 \times 10^{-8}$ | L1 L2          |
| 4        | 4          | $8.731444 \times 10^{-5}$ | L2 L5          |
| 5        | 4          | $6.293035 \times 10^{-4}$ | L2 L5          |
| 6        | 7          | $5.276619 \times 10^{-4}$ | L2 L5          |
| 6        | 8          | $5.386770 \times 10^{-5}$ | L2 L5          |
| 7        | 8          | $7.654884 \times 10^{-4}$ | L2 L5          |
| 8        | 4          | $2.578690 \times 10^{-8}$ | L2 L5          |
| 8        | 5          | $4.242361 \times 10^{-9}$ | L2 L5          |
| 9        | 4          | $5.278578 \times 10^{-5}$ | L2 L5          |
| 9        | 5          | $2.969653 \times 10^{-8}$ | L2 L5          |

**Table S2** The table shows all the significant pairwise rank sum tests for normalized stripe height after Bonferroni correction. See table S1 legend for details about position and time class.

**Table S3. Significance tests for stripe width**

| position | time class | p value                   | lines compared |
|----------|------------|---------------------------|----------------|
| 1        | 5          | $1.040544 \times 10^{-6}$ | L1 L2          |
| 3        | 6          | $1.145039 \times 10^{-3}$ | L1 L2          |
| 5        | 5          | $3.588720 \times 10^{-5}$ | L1 L2          |
| 5        | 6          | $3.391413 \times 10^{-4}$ | L1 L2          |
| 7        | 5          | $4.112780 \times 10^{-4}$ | L1 L5          |
| 1        | 7          | $5.276619 \times 10^{-4}$ | L2 L5          |
| 2        | 5          | $4.062358 \times 10^{-4}$ | L2 L5          |
| 2        | 6          | $1.031404 \times 10^{-3}$ | L2 L5          |
| 4        | 8          | $1.040497 \times 10^{-3}$ | L2 L5          |
| 5        | 4          | $1.114922 \times 10^{-3}$ | L2 L5          |
| 5        | 5          | $1.582401 \times 10^{-6}$ | L2 L5          |
| 5        | 6          | $2.708177 \times 10^{-5}$ | L2 L5          |
| 6        | 8          | $7.654884 \times 10^{-4}$ | L2 L5          |

**Table S3** The table shows all the significant pairwise rank sum tests for the stripe width after Bonferroni correction. The ‘position’ denotes the stripe number.

**Table S4. Significance tests for interstripe width**

| position | time class | p value                   | lines comed |
|----------|------------|---------------------------|-------------|
| 1        | 4          | $2.214837 \times 10^{-4}$ | L1 L2       |
| 3        | 5          | $4.448903 \times 10^{-4}$ | L1 L2       |
| 3        | 6          | $1.748151 \times 10^{-6}$ | L1 L2       |
| 3        | 7          | $4.824896 \times 10^{-5}$ | L1 L2       |
| 3        | 8          | $1.058453 \times 10^{-4}$ | L1 L2       |
| 4        | 4          | $1.309975 \times 10^{-5}$ | L1 L2       |
| 4        | 8          | $5.027652 \times 10^{-4}$ | L1 L2       |
| 1        | 4          | $1.186674 \times 10^{-3}$ | L1 L5       |
| 3        | 4          | $9.618514 \times 10^{-6}$ | L2 L5       |
| 3        | 5          | $4.242361 \times 10^{-9}$ | L2 L5       |
| 3        | 6          | $2.136629 \times 10^{-7}$ | L2 L5       |
| 3        | 7          | $9.671807 \times 10^{-6}$ | L2 L5       |
| 3        | 8          | $5.528527 \times 10^{-4}$ | L2 L5       |
| 4        | 4          | $1.761245 \times 10^{-5}$ | L2 L5       |
| 4        | 5          | $1.293801 \times 10^{-3}$ | L2 L5       |
| 4        | 6          | $4.483716 \times 10^{-4}$ | L2 L5       |
| 4        | 8          | $1.275814 \times 10^{-4}$ | L2 L5       |
| 5        | 6          | $4.844806 \times 10^{-5}$ | L2 L5       |
| 5        | 8          | $3.940848 \times 10^{-4}$ | L2 L5       |

**Table S4** The table shows all the significant pairwise rank sum tests for interstripe width after Bonferroni correction. The ‘position’ ranges from 1 to 6, where ‘1’ represents the 1-2 interstripe and so on.

**Table S5. Gene list**

| gene name     | chromosome | begin    | end      |
|---------------|------------|----------|----------|
| <i>bcd</i>    | chr3R      | 2579564  | 2587188  |
| <i>cad</i>    | chr2L      | 20768731 | 20785135 |
| <i>ftz</i>    | chr3R      | 2688046  | 2693966  |
| <i>gt</i>     | chrX       | 2319146  | 2325000  |
| <i>hairy</i>  | chr3L      | 8666859  | 8674353  |
| <i>hb</i>     | chr3R      | 4514702  | 4525544  |
| <i>kni</i>    | chr3L      | 20683430 | 20689656 |
| <i>Kr</i>     | chr2R      | 21112134 | 21120917 |
| <i>odd</i>    | chr2L      | 3602224  | 3608756  |
| <i>paired</i> | chr2L      | 12080995 | 12087827 |
| <i>runt</i>   | chrX       | 20559697 | 20570348 |
| <i>slp1</i>   | chr2L      | 3823675  | 3829099  |
| <i>slp2</i>   | chr2L      | 3834840  | 3841185  |
| <i>tll</i>    | chr3R      | 26676037 | 26682122 |
| <i>eve</i>    | chr2R      | 5860288  | 5876667  |

**Table S5** The table shows the genes and their genomic locations used to detect large deletions or insertions that are present in L2 but absent in L1 and L5. The sequences are from 2kb upstream and downstream of each protein coding gene (RefSeq track from UCSC browser on 9.18.2014), except *eve*, which used 16kb whole-locus sequence.

**Table S6. Number of embryos collected for each line**

|                   | T4 | T5 | T6 | T7 | T8 |
|-------------------|----|----|----|----|----|
| L1_original       | 24 | 12 | 14 | 10 | 13 |
| L1_OK_orientation | 15 | 12 | 10 | 9  | 12 |
| L1_final          | 15 | 12 | 10 | 9  | 8  |
| L2_original       | 19 | 19 | 14 | 13 | 15 |
| L2_OK_orientation | 18 | 19 | 13 | 13 | 13 |
| L2_final          | 14 | 18 | 13 | 13 | 11 |
| L5_original       | 16 | 14 | 15 | 18 | 12 |
| L5_OK_orientation | 15 | 14 | 15 | 14 | 11 |
| L5_final          | 15 | 14 | 15 | 14 | 11 |

**Table S6** There are three numbers indicated for each line. The label ending with “original” denotes the total number of embryos imaged at the confocal microscope. The label ending with “OK\_orientation” denotes those embryos which have approximately lateral orientation and were analyzed further. The label ending with “final” denotes the number of embryos used in feature detection for extrema and borders. Only T4 to T8 embryos were used. This number includes manually recovered embryos that have more than or less than the normal number of extrema.



Table S7. L2 sequence expanding deletion in *kni* PCR

| L2_kni_PCR                                                                                                                                                                                                                                                                                                                                                                                                                                                                                                                                                                                                                                                                                                                                                                                                                                                                                                                                                                                                                                                                                                                                                                                                                                                                                                                                                                                                                                                                                                                                                                                                                                                                                                                                                                                                                                                                                                                                                                                                                                                                                                                        |
|-----------------------------------------------------------------------------------------------------------------------------------------------------------------------------------------------------------------------------------------------------------------------------------------------------------------------------------------------------------------------------------------------------------------------------------------------------------------------------------------------------------------------------------------------------------------------------------------------------------------------------------------------------------------------------------------------------------------------------------------------------------------------------------------------------------------------------------------------------------------------------------------------------------------------------------------------------------------------------------------------------------------------------------------------------------------------------------------------------------------------------------------------------------------------------------------------------------------------------------------------------------------------------------------------------------------------------------------------------------------------------------------------------------------------------------------------------------------------------------------------------------------------------------------------------------------------------------------------------------------------------------------------------------------------------------------------------------------------------------------------------------------------------------------------------------------------------------------------------------------------------------------------------------------------------------------------------------------------------------------------------------------------------------------------------------------------------------------------------------------------------------|
| TTTTTCTTTTAGTAACAAAAATAAACAACGAGGGTTTTTGGGGCGACTCCTCCCACTTG<br>GTTTTTTCGCCGTGTACTIONTAGACACACACGAATATCCCTCATGGCACTAGCCGATTG<br>TGGGCCACCGGAAGCCACCGAAGTGGGTGGCCTCTGCACCACCTAGCTTCTGCCGCTG<br>ACTTCCGCATGGGCGGTGGTGGTGTTCGGTGAGTGGGCGGCGGAGTGGGAGGAACGCTG<br>CTGCTGGTGGTCAGGCACTCGGCCTCCAGTTGGTAGAACTTCCGGCGCGGAGCCACCTCC<br>ACTTCTTGATCCTCGGAGCCGCTGTCTGTTGAAGCTGTGCACGGAGCTCCGCGAGGTCTTC<br>ATGCTCAGATCCATGGGTCCTTCTTGAGCGGAAACGGTGGGAGGATGCACTGGTACAACG<br>CTGGTGGTTTTCGCCCAATGGAGCAAACCGAAACGGGCGACAAGCTCTGCATCTTGGCC<br>GCAAACTCAGCGGGCTGCTGCTAGTCGGAGTGGTTGGCGTGGCTCGGATGGCAATGGGA<br>TGCAGGAGGCTTGGCGACGACTGATGGCTGTGCACGGAGTGAACATCCTCCTCCAGGCAG<br>ACATCGATGGGCGACTGGCGGGCCGAGGAGTGGGCTGCACCACTGGTGGCTGGCTGGCG<br>GGACTAAAGCGGTTCTGCGACTCAACGGAATCCACGCTCTGGCGGTGCTTGTACATCTCC<br>TGCCGGTAAGCGGCATCGGCAGCAGAAGCCGCTGCAGCGGCAGCACTTGCATGGTAGCCT<br>GGGAAGAGGAGGTGTGGGGCAGCTGGAAGGGCGACTGGTGGGTACACCGCCCATCATG<br>CTGAAGAACGGCAGGGCGGGATGGGTCCGACAGATAGCTGGGATAGCCAGCAGAGGC<br>ATATGTGGATGACGCGCACCTGCTGCTGCTGCTGCTGCTGATGATGGTGGTGCAAATGG<br>GCGGCCATGTCCCAAATCCGGGAGTGTGTGTCGAGCCCACCGGGAAGAGGCCGACGGG<br>GCACCACCACCGATACGCCACCCGCTAATGGAGGCGCCTTGCCCGCCGCTGCGGCGGCC<br>TGTTCTGCTCCTGCAGCAGACAATGGATCTTGAACCAGTTGGAGCGACGTCCGTAGCGG<br>GATCCCCCTTCGACATGCCACGTTGTAGCACTTCCTCAAGCGGCACGCCTTGCAGGTG<br>GTGCGGTTCTTCTTGTGATGATGCACTTGCCCTCGTTCTTGCACCTCGCTGATGGTGTG<br>ATGTTGTTGTAAGAGCGGCCAAAGAAGGACTGCAATGGCGAAGGGAAGGACGAATGTGGC<br>TTAGTTATGTGGTATGCAACTGATTAGCAAAGAAGAGCAGAAATTCATTCAAGAACTTA<br>AGGCCAATGGTACAACGATTTGAATCGCCGATGGCCTGTTCTCGAACATTTCTAAAACT<br>AACCCCTTGGGGGTTACGTTCTGCTAATTTATTTGTCAATGGATTTCTTGAGACACAAC<br>TTACCTTGCAGCCCTCGCAGGTGAAGGCGCCAAAATGGAAGCCCGCCGCGGCTCACCGC<br>ACACTTTCATGTCTGGTTCATCTGGAAGATTGTAAGAAATCCCGCGTTAGTAAGGGTT<br>TAATCCACTGGTCGAGAGGTATATGTGTAATCCACAAGTAGGCGAACGGCTCTGGCACT<br>AACCAAGTTGAACACCATTTTGAATGATATTTGTTGGAATTTTGAATGCTTTTCTCAGG<br>ATCGCTGTGAGGATCTGCTGTATGATCTGTTGCTTGGAAATGCTGCTGAGCAACTGATGC<br>TGAGCTCTAGGCGGGCCAGGATATATATAGGAACTGGGAAAACTAGACAGGTCTCGCT<br>CAGAACTTACTTTTTGGTTTTTTTTGTTGGATGGGCACTAGGTTTATGACGACTTTTTTA<br>ATTGCAGCGATTTCGGATCGTTGCTGCACG |

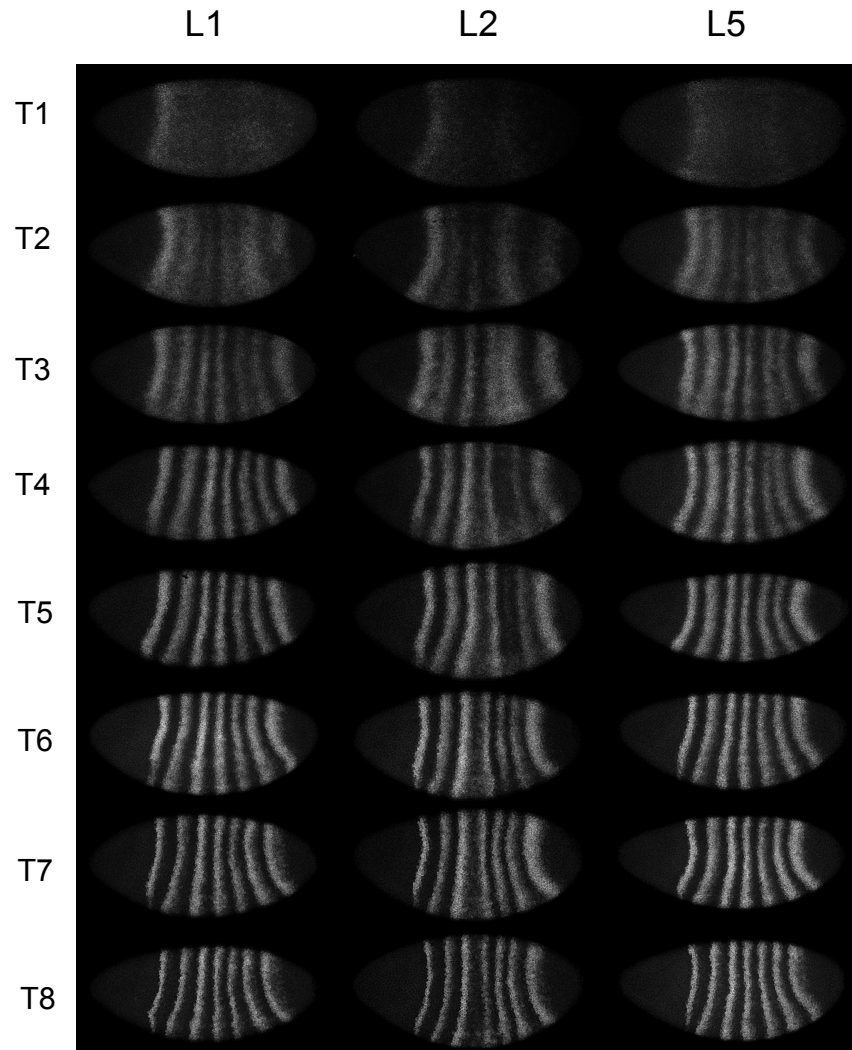

**Figure S1. *eve* RNA expression from 3 lines** Fluorescent *in situ* images of *eve* RNA expression of the same embryos chosen in Figure 1. Anterior is to the left and dorsal is up.

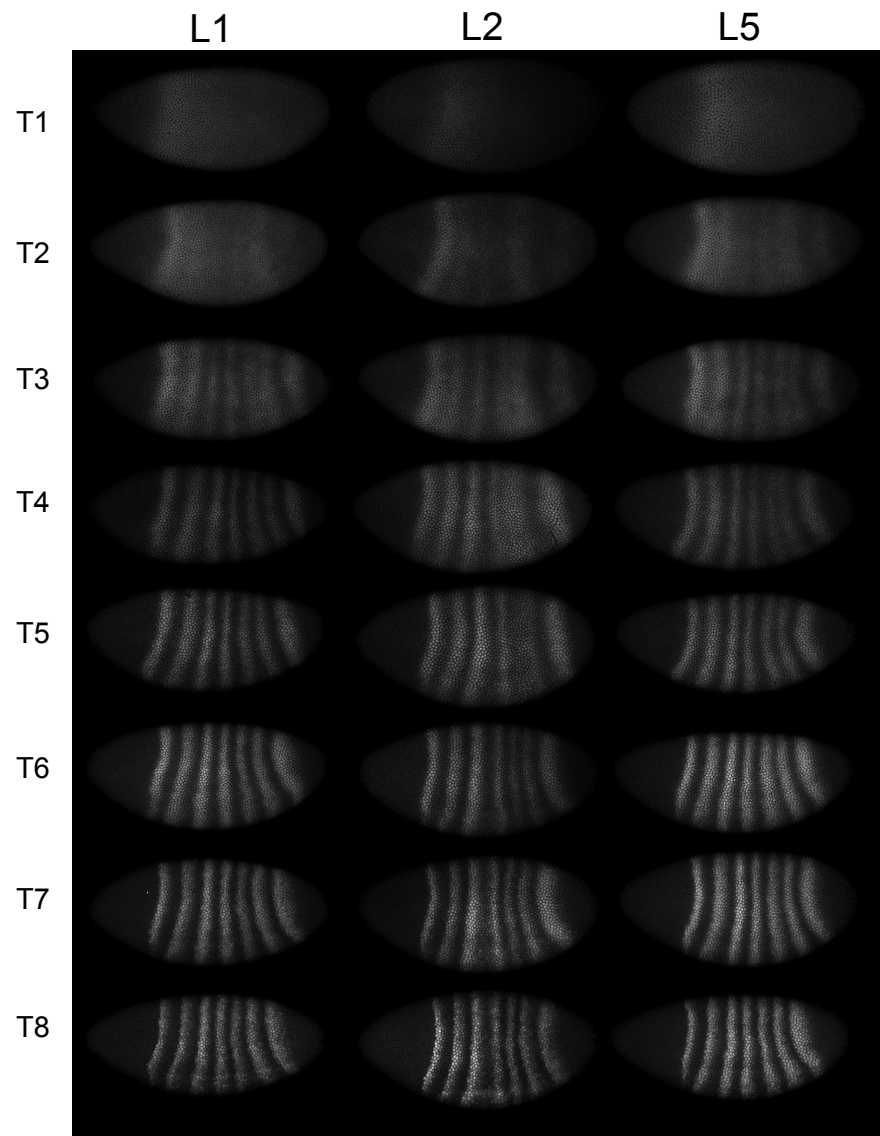

**Figure S2.** *eve* protein expression from the 3 lines. Antibody staining for Eve protein of the same embryos chosen in Figure 1.

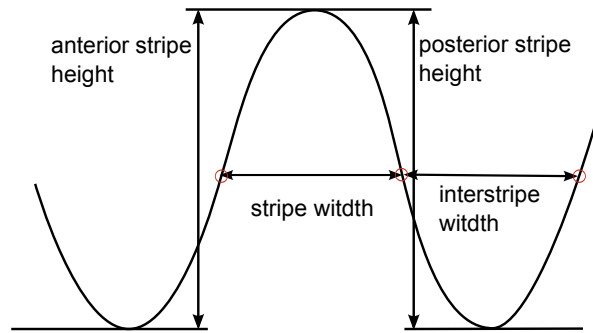

**Figure S3.** Schematic graph of *eve* stripe features

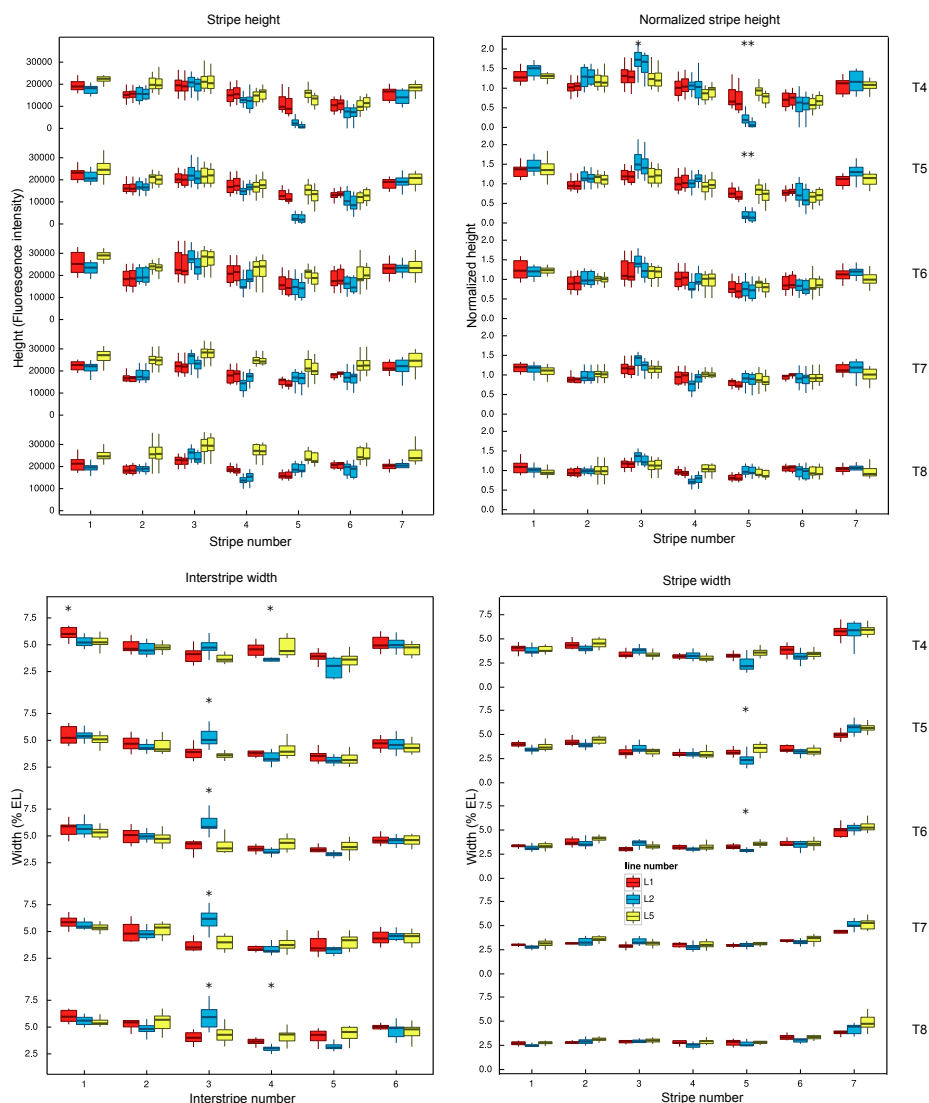

**Figure S4. *eve* features for 3 lines** The figure shows stripe height, normalized stripe height, interstripe width, and stripe width for the 3 lines. Red denotes L1, blue L2, and yellow L5. For stripe height, there are two boxes representing each stripe. The one on the left denotes the anterior half of the stripe and the right denotes the posterior half, except the first and last, which have only the posterior half of stripe 1 and anterior half of stripe 7. The asterisks mark the significant difference between one line to the other two lines after Bonferroni correction for each position at each time class (only mark in normalized stripe height, interstripe width and stripe width). Outliers in boxplot are not shown.

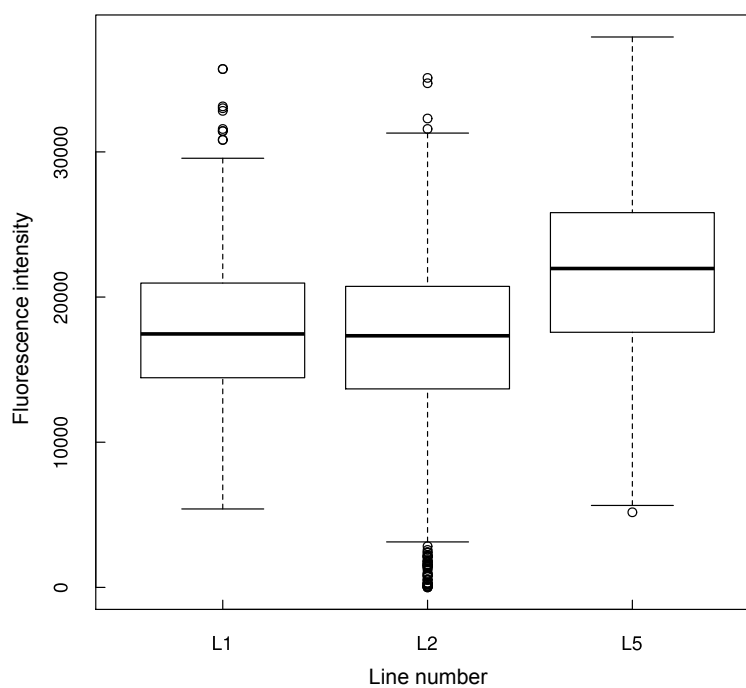

**Figure S5. Boxplot of overall stripe height among 3 lines.** Boxplot of absolute stripe height in fluorescence intensity for three lines from T4 to T8. L5 is significantly higher than L1 and L2 in overall stripe height. The boundary of box is first quartile, median, and third quartile. The whiskers extend to the most extreme data point which is no more than 1.5 times the interquartile range from the box. Outliers are marked in circles.

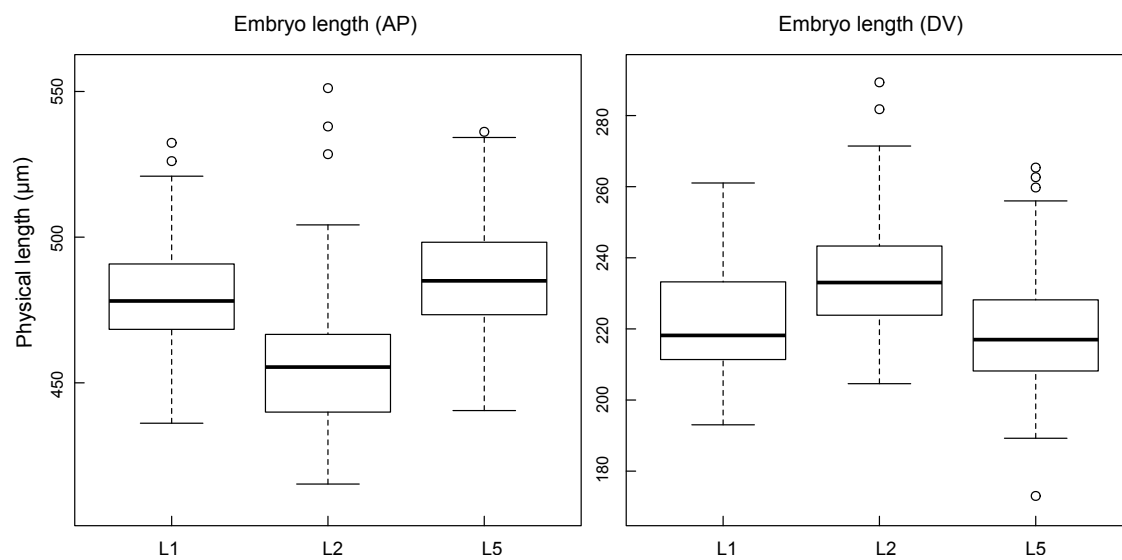

Figure S6. Comparison of embryo size in 3 lines.

```

1   TATCCAAGGCCGCAAAAGTCAACAAGTCGGCAGCAAATTTCCCTTTGTCCGGCGAAGTgt 60
1   .....T..... 60
1   .....T..... 60

61   ttttttttAACATAACTCGCTGCATTGTTGGGCCAAGTTTTCTTCTGCCAAATTGC 120
61   .....G..... 120
61   .....G..... 120

121  GGAGATGATCGGGGATTATGCGCTGATTGCGTGCAATTATGGACATCCTGCGAGGCCCC 180
121  ..... 180
121  ..... 180

181  GAGGAACTCCTGCTAAAGCCTTTCATCGCCTAAAGAACCCTTTGTGCCGTTCGCC 240
181  .....T..... 240
181  .....C..... 240
181  .....C..... 240

241  GGGAGTCCTTGACGGGTCTTCGACTATTCGCTTACAGCAGCTTGCCTAAAATTTATAA 300
241  ..... 300
241  ..... 300

301  CCTACGAGCGGCTCTTCGGCGAATCCCTGGCATTATCCTTTTACCTTTGCCAATCC 360
301  ..... 360
301  ..... 360

361  GTTGGCTAAAAACGGCTTCGACTTCGCGTAACTGCTGGACAACAAGACAAAAACGG 420
361  ..... 420
361  ..... 420

421  CGAAAGGACGGCGATTTCCAGGTAGCATTGCGAATTCGTCAAACAAAGGACCGGTTAT 480
421  ..... 480
421  ..... 480

481  ATAACGGGTTTATATGGCCAGAATCTCTGCATCTCCACGACCGCCAGAAGCTGCGTAAAA 540
481  ..... 540
481  ..... 540

541  CTGCAGGCTCTGTTTGTATTCTGCAACTTCAGTTAATTGCCCGGGATGCCAGCAATTG 600
541  ..... 600
541  ..... 600

601  CCGCAATTATAAACAGCGCAGATGTGACTCAGCTTCCATATCTAACTCTATATCTCAT 660
601  ..... 660
601  ..... 660

661  GCCGAAAATCGaggggtggggagcggagggggcggggtgctgggtgacttgccctgccaggg 720
661  ..... 720
661  .....T..... 720

721  aaagggggcgggggtTCAGCGGGTGATAAATGTGCGTGATTGGAATGAATGCGCATCGA 780
721  ..... 780
721  ..... 780

781  TTA AACCGCAGGGCAATCAATTT 804
781  ..... 804
781  ..... 804

```

Figure S7. Alignment of stripe 5 enhancer of the three lines The first row is L1, second is L2 and third is L5.

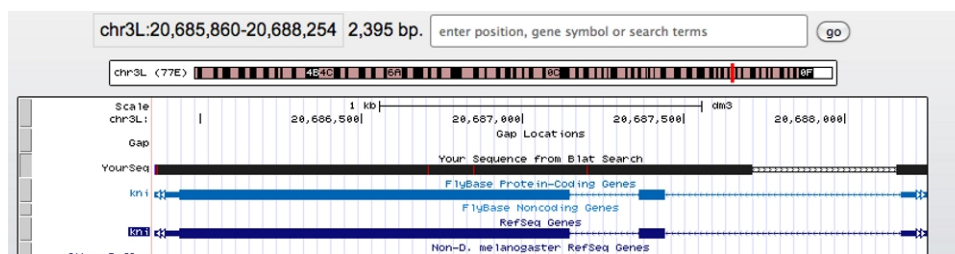

Figure S8. BLAT of L2 showing a deletion in the intron of *kni*
